# Supplementary material for: Co2Mo3O8/reduced graphene oxide composite: synthesis, characterization, and its role as a prospective anode material in lithium ion batteries
Source: Royal Society of Chemistry journal article supplement (doi:10.1039/c6ra10192e), 2016-01-01
Supplement: c6ra10192e1.pdf [file c6ra10192e1.pdf]

**Co<sub>2</sub>Mo<sub>3</sub>O<sub>8</sub>/Reduced Graphene Oxide Composite: Synthesis, Characterization, and its  
Role as a Prospective Anode Material in Lithium Ion Batteries**

Sandeep K. Marka, Shaikshavali Petnikota, Vadali V. S. S. Srikanth, M. V. Reddy, Stefan

Adams, B. V. R. Chowdari

**Electronic Supplementary Information**

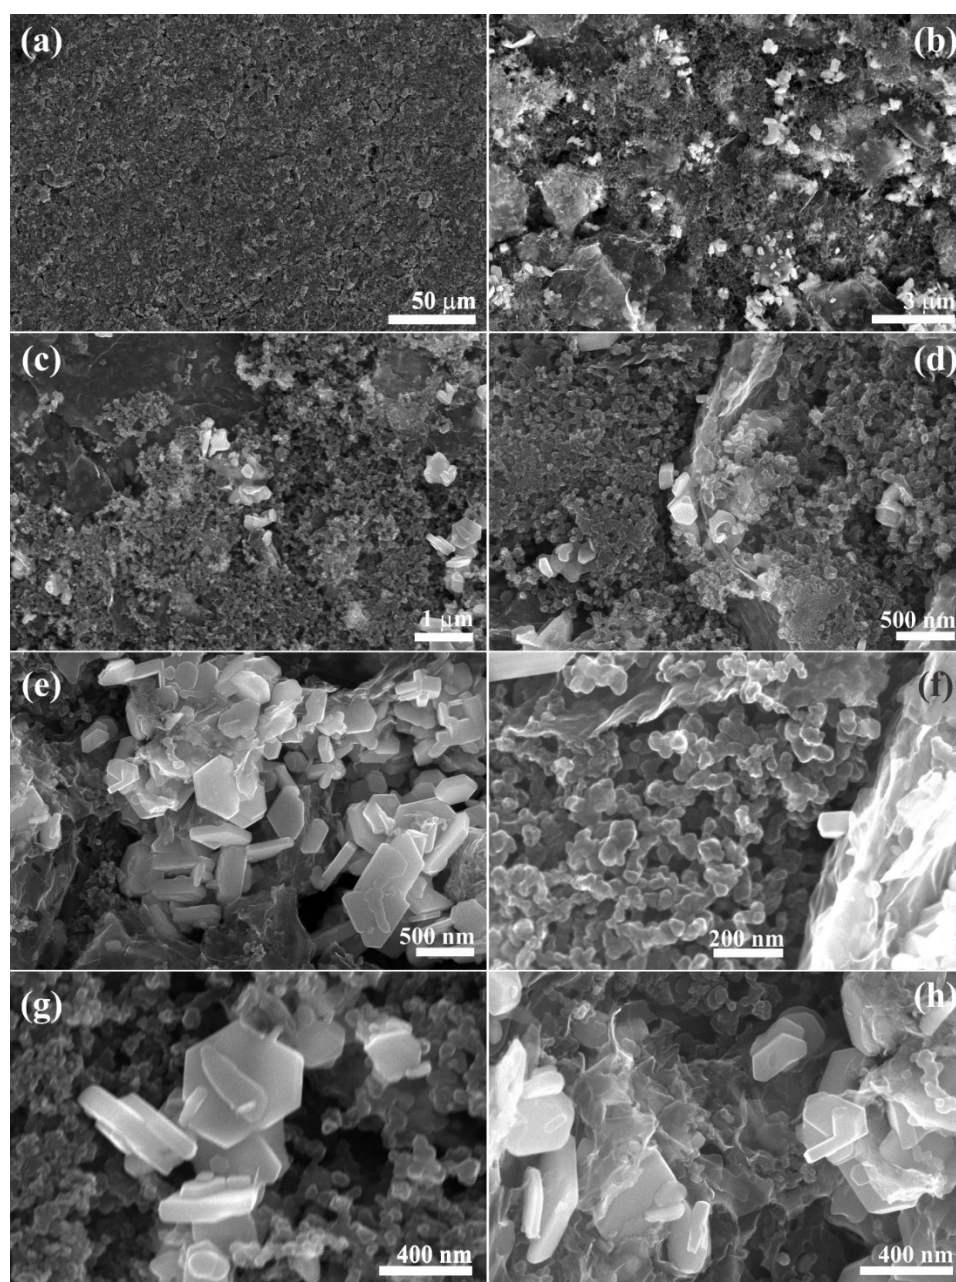

**Figure ESI1.** Field emission scanning electron microscope images of Co<sub>2</sub>Mo<sub>3</sub>O<sub>8</sub>/rGO composite electrode at different magnifications.

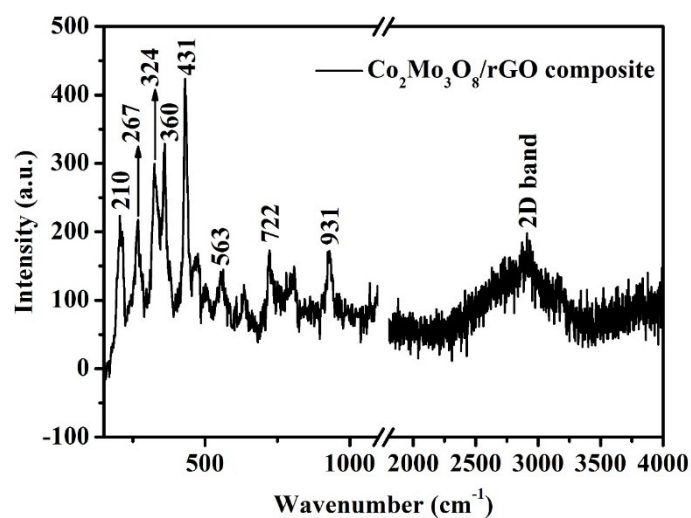

**Figure ESI2.** Raman spectrum of  $\text{Co}_2\text{Mo}_3\text{O}_8/\text{rGO}$  composite, respectively.

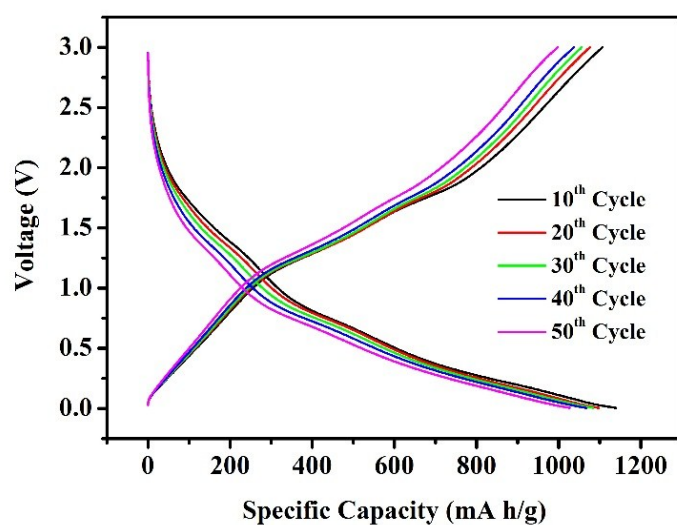

**Figure ESI3.** Galvanostatic discharge and charge curves of  $\text{Co}_2\text{Mo}_3\text{O}_8/\text{rGO}$  composite at 10<sup>th</sup>, 20<sup>th</sup>, 30<sup>th</sup>, 40<sup>th</sup> and 50<sup>th</sup> cycles in the voltage range of 0.005-3.0 V and at 60  $\text{mA/g}$  current density.
